# Supplementary material for: Obstructive Sleep Apnea and Nonalcoholic Fatty Liver Disease in the General Population: A Cross-Sectional Study Using Nationally Representative Data
Source: MDPI journal article supplement (doi:10.3390/ijerph19148398), 2022-07-09
Supplement: s1 [file s1]

**Supplementary Table S1.** Multivariable-adjusted OR (95% CI) for NAFLD by the risk of having OSA according to the usage of the cholesterol-lowering drug and the presence of diabetes.

| <b>By usage of cholesterol-lowering drug</b> |     |                   |                     |          |
|----------------------------------------------|-----|-------------------|---------------------|----------|
|                                              | Low | Intermediate      | High                | <i>p</i> |
| <b>All</b>                                   |     |                   |                     |          |
| No (n = 251)                                 | 1   | 2.83 (0.94–8.47)  | 5.79 (1.04–32.34)   | 0.027    |
| Yes (n = 796)                                | 1   | 0.88 (0.53–1.45)  | 0.90 (0.35–2.27)    | 0.773    |
| <b>BMI ≥ 25kg/m<sup>2</sup></b>              |     |                   |                     |          |
| No (n = 99)                                  | 1   | 7.89 (1.84–33.99) | 38.32 (3.54–415.04) | 0.001    |
| Yes (n = 387)                                | 1   | 0.91 (0.49–1.69)  | 0.80 (0.31–2.07)    | 0.646    |
| <b>BMI &lt; 25kg/m<sup>2</sup></b>           |     |                   |                     |          |
| No (n = 152)                                 | 1   | 0.32 (0.03–3.20)  | 1.07 (0.06–18.02)   | 0.806    |
| Yes (n = 409)                                | 1   | 0.70 (0.28–1.79)  | 1.85 (0.34–10.11)   | 0.719    |
| <b>By presence of diabetes</b>               |     |                   |                     |          |
|                                              | Low | Intermediate      | High                | <i>p</i> |
| <b>All</b>                                   |     |                   |                     |          |
| No (n = 3,547)                               | 1   | 1.87 (1.34–2.62)  | 2.83 (1.49–5.38)    | <0.001   |
| Yes (n = 728)                                | 1   | 0.85 (0.48–1.49)  | 1.87 (0.71–4.95)    | 0.333    |
| <b>BMI ≥ 25kg/m<sup>2</sup></b>              |     |                   |                     |          |
| No (n = 1,191)                               | 1   | 2.03 (1.44–2.85)  | 2.99 (1.50–5.95)    | <0.001   |
| Yes (n = 400)                                | 1   | 0.99 (0.46–2.12)  | 1.91 (0.61–5.98)    | 0.242    |
| <b>BMI &lt; 25kg/m<sup>2</sup></b>           |     |                   |                     |          |
| No (n = 2,356)                               | 1   | 1.51 (0.71–3.24)  | 3.10 (0.87–11.09)   | 0.085    |
| Yes (n = 328)                                | 1   | 0.79 (0.35–1.75)  | 4.40 (1.01–19.22)   | 0.41     |

Multivariate model considered age, sex, residence, education, household income, smoking, physical activity, and body mass index as covariates. The risk of having OSA was measured using STOP-Bang questionnaires. OR = odds ratio, CI = confidence interval, OSA = obstructive sleep apnea, NAFLD = non-alcoholic fatty liver disease, STOP-Bang = snoring, tiredness, observed apnea, high BP, BMI, age, neck circumference, and male gender.
